# Supplementary material for: The Inflammation-Coagulation-Muscle Injury cascade: a clinically actionable nomogram for early mechanical ventilation prediction in tetanus
Source: Research Square preprint supplement (doi:10.21203/rs.3.rs-8786554/v1), 2026-02-16
Supplement: Supplementary file 1 [file 3b78ed4e1440dced3f55ea0d.docx]

**TableS1.Univariate logistic regression analysis for predicting mechanical ventilation in tetanus patients.**

| **Characteristic** | **β** | **SE** | **z** | **OR(95%CI)** | ***p*** |
| --- | --- | --- | --- | --- | --- |
| Gender |  |  |  |  |  |
| Male | 0.000 |  |  | reference |  |
| Female | 0.424 | 0.275 | 1.544 | 1.528(0.895,2.629) | 0.123 |
| Age | 0.023 | 0.008 | 2.800 | 1.024(1.007,1.041) | 0.005 |
| Smoking History |  |  |  |  |  |
| No | 0.000 |  |  | reference |  |
| Yes | 0.047 | 0.324 | 0.145 | 1.048(0.556,1.992) | 0.884 |
| Alcohol History |  |  |  |  |  |
| No | 0.000 |  |  | reference |  |
| Yes | -0.202 | 0.356 | -0.567 | 0.817(0.405,1.648) | 0.571 |
| BMI | -0.005 | 0.037 | -0.142 | 0.995(0.924,1.070) | 0.887 |
| STDT | -0.037 | 0.023 | -1.584 | 0.964(0.917,1.006) | 0.113 |
| Incubation Period |  |  |  |  |  |
| <10 | 0.000 |  |  | reference |  |
| ≥10 | 0.172 | 0.281 | 0.613 | 1.188(0.686,2.067) | 0.540 |
| Injury Site |  |  |  |  |  |
| Multiple wounds | 0.000 |  |  | reference |  |
| Upper extremity | -15.656 | 650.874 | -0.024 | - |  |
| Head And Neck | -15.343 | 650.874 | -0.024 | - |  |
| Unknown | -15.213 | 650.874 | -0.023 | - |  |
| Lower extremity | -15.474 | 650.874 | -0.024 | - |  |
| Debridement |  |  |  |  |  |
| No | 0.000 |  |  | reference |  |
| Yes | -0.600 | 0.660 | -0.909 | 0.549(0.137,1.976) | 0.363 |
| Hypertension |  |  |  |  |  |
| No | 0.000 |  |  | reference |  |
| Yes | -0.075 | 0.356 | -0.211 | 0.928(0.461,1.878) | 0.833 |
| Diabetes Mellitus |  |  |  |  |  |
| No | 0.000 |  |  | reference |  |
| Yes | 0.015 | 0.621 | 0.025 | 1.015(0.297,3.618) | 0.980 |
| Coronary Heart Disease |  |  |  |  |  |
| No | 0.000 |  |  | reference |  |
| Yes | 1.473 | 1.104 | 1.335 | 4.364(0.689,84.343) | 0.182 |
| COPD |  |  |  |  |  |
| No | 0.000 |  |  | reference |  |
| Yes | 1.154 | 0.486 | 2.373 | 3.172(1.290,8.971) | 0.018 |
| CKD |  |  |  |  |  |
| No | 0.000 |  |  | reference |  |
| Yes | 1.638 | 0.563 | 2.908 | 5.147(1.879,18.117) | 0.004 |
| Cardiovascular And Cerebrovascular Diseases |  |  |  |  |  |
| No | 0.000 |  |  | reference |  |
| Yes | 1.090 | 0.379 | 2.872 | 2.973(1.452,6.503) | 0.004 |
| Liver Cirrhosis |  |  |  |  |  |
| No | 0.000 |  |  | reference |  |
| Yes | 14.406 | 882.743 | 0.016 | 1805661.620(0.000,NA) | 0.987 |
| Active Tumor |  |  |  |  |  |
| No | 0.000 |  |  | reference |  |
| Yes | 1.664 | 1.088 | 1.529 | 5.282(0.882,100.631) | 0.126 |
| WBC(10⁹/L) | 0.148 | 0.043 | 3.446 | 1.159(1.071,1.268) | 0.001 |
| RBC(1012/L) | -0.499 | 0.194 | -2.566 | 0.607(0.410,0.881) | 0.010 |
| HGB(g/L) | -0.019 | 0.007 | -2.704 | 0.981(0.967,0.994) | 0.007 |
| PLT(10⁹/L) | 0.001 | 0.002 | 0.582 | 1.001(0.998,1.004) | 0.561 |
| NEUT(10⁹/L) | 0.190 | 0.046 | 4.130 | 1.209(1.111,1.331) | <0.001 |
| LYMP(10⁹/L) | -0.391 | 0.171 | -2.281 | 0.677(0.476,0.930) | 0.023 |
| MONO(10⁹/L) | 1.424 | 0.550 | 2.588 | 4.152(1.563,13.377) | 0.010 |
| EO(10⁹/L) | -1.021 | 0.944 | -1.082 | 0.360(0.046,2.125) | 0.279 |
| BASO(10⁹/L) | -0.064 | 0.067 | -0.949 | 0.938(0.819,1.069) | 0.343 |
| HCT(%) | -0.050 | 0.025 | -1.990 | 0.952(0.905,0.998) | 0.047 |
| MCV(fL) | 0.019 | 0.014 | 1.358 | 1.019(0.992,1.049) | 0.175 |
| MCH(pg) | 0.008 | 0.039 | 0.198 | 1.008(0.932,1.089) | 0.843 |
| MCHC(g/L) | -0.016 | 0.008 | -2.079 | 0.984(0.969,0.999) | 0.038 |
| PT(s) | 0.187 | 0.090 | 2.072 | 1.206(1.027,1.457) | 0.038 |
| INR | 2.434 | 1.107 | 2.199 | 11.403(1.614,118.155) | 0.028 |
| FIB(g/L) | 0.375 | 0.129 | 2.908 | 1.454(1.138,1.889) | 0.004 |
| APTT(s) | 0.012 | 0.025 | 0.460 | 1.012(0.964,1.071) | 0.646 |
| TT(s) | -0.007 | 0.010 | -0.712 | 0.993(0.966,1.012) | 0.476 |
| AT3(%) | -0.004 | 0.008 | -0.576 | 0.996(0.980,1.011) | 0.565 |
| PTA(%) | -0.018 | 0.008 | -2.382 | 0.982(0.967,0.996) | 0.017 |
| DD(mg/L) | 0.130 | 0.038 | 3.384 | 1.139(1.065,1.238) | 0.001 |
| ALT(U/L) | 0.018 | 0.008 | 2.196 | 1.018(1.003,1.036) | 0.028 |
| AST(U/L) | 0.021 | 0.007 | 3.014 | 1.021(1.009,1.036) | 0.003 |
| GGT(U/L) | 0.009 | 0.005 | 1.783 | 1.009(1.001,1.021) | 0.075 |
| ALP(U/L) | 0.003 | 0.004 | 0.854 | 1.003(0.996,1.011) | 0.393 |
| CHE(U/L) | -0.000 | 0.000 | -2.289 | 1.000(1.000,1.000) | 0.022 |
| TP(g/L) | -0.009 | 0.012 | -0.703 | 0.991(0.967,1.016) | 0.482 |
| ALB(g/L) | -0.052 | 0.026 | -2.012 | 0.949(0.901,0.998) | 0.044 |
| GLO(g/L) | 0.024 | 0.014 | 1.640 | 1.024(0.997,1.056) | 0.101 |
| TBIL(μmol/L) | 0.007 | 0.013 | 0.557 | 1.007(0.982,1.035) | 0.578 |
| DBIL(μmol/L) | 0.012 | 0.037 | 0.328 | 1.012(0.941,1.092) | 0.743 |
| IBIL(μmol/L) | 0.011 | 0.017 | 0.653 | 1.011(0.978,1.047) | 0.514 |
| TBA(μmol/L/L) | -0.020 | 0.022 | -0.884 | 0.981(0.933,1.022) | 0.377 |
| UREA(mmol/L) | 0.186 | 0.050 | 3.703 | 1.204(1.097,1.336) | <0.001 |
| CRE(μmol/L) | 0.004 | 0.004 | 1.020 | 1.004(0.997,1.013) | 0.308 |
| UA(μmol/L) | -0.000 | 0.001 | -0.111 | 1.000(0.998,1.002) | 0.912 |
| K(mmol/L) | 0.113 | 0.270 | 0.419 | 1.120(0.660,1.922) | 0.675 |
| Na(mmol/L) | 0.040 | 0.035 | 1.162 | 1.041(0.973,1.116) | 0.245 |
| CL(mmol/L) | 0.058 | 0.030 | 1.958 | 1.060(1.001,1.126) | 0.050 |
| Ca(mmol/L) | -1.676 | 0.826 | -2.029 | 0.187(0.036,0.923) | 0.042 |
| Mg(mmol/L) | 0.220 | 0.897 | 0.245 | 1.246(0.215,7.422) | 0.806 |
| P(mmol/L) | 0.258 | 0.471 | 0.548 | 1.295(0.516,3.305) | 0.583 |
| LDH(U/L) | 0.005 | 0.002 | 3.071 | 1.005(1.002,1.008) | 0.002 |
| HBDH(U/L) | 0.005 | 0.002 | 2.777 | 1.005(1.002,1.009) | 0.005 |
| CK(U/L) | 0.000 | 0.000 | 0.946 | 1.000(1.000,1.000) | 0.344 |
| CKMB(U/L) | 0.039 | 0.010 | 4.085 | 1.040(1.022,1.061) | <0.001 |
| CRP(mg/L) | 0.006 | 0.006 | 0.908 | 1.006(0.995,1.021) | 0.364 |
| hsCRP (mg/L) | 0.005 | 0.004 | 1.263 | 1.005(0.998,1.013) | 0.207 |
| PCT (μg/L, x̄±s) | 0.200 | 0.130 | 1.540 | 1.221(0.988,1.681) | 0.124 |
| MYO(μg/L) | 0.002 | 0.001 | 2.738 | 1.002(1.001,1.004) | 0.006 |

Abbreviations: ALB: Albumin; ALP: Alkaline Phosphatase; ALT: Alanine Aminotransferase; AP: Antithrombin III; APTT: Activated Partial Thromboplastin Time; AST: Aspartate Aminotransferase; BASO: Basophils; BMI: Body Mass Index; Ca: Calcium; CHE: Cholinesterase; CK: Creatine Kinase; CK-MB: Creatine Kinase-MB; CL: Chloride; COPD: Chronic Obstructive Pulmonary Disease; CRP: C-Reactive Protein; CRE: Creatinine; DBIL: Direct Bilirubin; DBP: Diastolic Blood Pressure; DD: D-Dimer; EO: Eosinophils; FIB: Fibrinogen; GGT: Gamma-Glutamyl Transferase; GLO: Globulin; HBDH: Alpha-Hydroxybutyrate Dehydrogenase; HCT: Hematocrit; HGB: Hemoglobin; hsCRP: High-Sensitivity C-Reactive Protein; IBIL: Indirect Bilirubin; INR: International Normalized Ratio; K: Potassium; LDH: Lactate Dehydrogenase; LYMP: Lymphocytes; MCH: Mean Corpuscular Hemoglobin; MCHC: Mean Corpuscular Hemoglobin Concentration; MCV: Mean Corpuscular Volume; Mg: Magnesium; MONO: Monocytes; MYO: Myoglobin; Na: Sodium; NEUT: Neutrophil Count; P: Phosphorus; PCT: Procalcitonin; PLT: Platelet Count; PTA: Prothrombin Activity; PT: Prothrombin Time; RBC: Red Blood Cell Count; SSP: Systolic Blood Pressure; STDT: Symptom-to-Door Time; TBIL: Total Bilirubin; TBA: Total Bile Acids; TP: Total Protein; TT: Thrombin Time; UA: Uric Acid; Unknown: Injury History with Indeterminate Causal Link; WBC: White Blood Cell Count.

**Table S2. Lasso regression screening results for predicting mechanical ventilation needs in tetanus patients.**

| **Feature** | **Coefficient** | **lambda.1se** | **lambda.min** |
| --- | --- | --- | --- |
| Intercept | -1.058172892 | 0.0760803493382714 | 0.0226996924342926 |
| Age | 0.002867326 |  |  |
| CKD | 0.235772 |  |  |
| NEUT | 0.050891126 |  |  |
| DD | 0.02219085 |  |  |
| Urea | 0.022617444 |  |  |
| CKMB | 0.010076468 |  |  |

Notes: CKD: Chronic Kidney Disease, DD: D-dimer, CKMB: Creatine Kinase-MB, NEUT: Neutrophil count.

**TableS3.Multivariable logistic regression analysis for predicting mechanical ventilation in tetanus patients.**

| **Variable** | ***β*** | **SE** | ***z*** | **OR (95%CI)** | ***p*** | **VIF** |
| --- | --- | --- | --- | --- | --- | --- |
| Age | 0.031 | 0.011 | 2.966 | 1.032(1.011,1.054) | 0.003 | 1.070934887 |
| CKD |  |  |  |  |  | 1.015990776 |
| No | 0.000 |  |  | reference |  |  |
| Yes | 1.597 | 0.610 | 2.619 | 4.939(1.621,18.681) | 0.009 |  |
| NEUT | 0.171 | 0.052 | 3.328 | 1.187(1.078,1.321) | 0.001 | 1.056724604 |
| DD | 0.085 | 0.037 | 2.284 | 1.089(1.019,1.182) | 0.022 | 1.0148262 |
| CKMB | 0.033 | 0.010 | 3.200 | 1.034(1.015,1.057) | 0.001 | 1.044857612 |

Notes: CKD: Chronic Kidney Disease, DD: D-dimer, CKMB: Creatine Kinase-MB, NEUT: Neutrophil count, OR: Odds Ratio, SE: Standard Error, VIF: Variance Inflation Factor.

**TableS4.** **Performance metrics of the nomogram in the derivation cohort.**

| **Metric** | **Result** |
| --- | --- |
| Cutoff Value | 0.576 |
| AUC | 0.813(95%Cl:0.757-0.868) |
| P-value | ＜0.001 |
| Sensitivity | 0.675(95%Cl:0.592-0.758) |
| Specificity | 0.837(95%Cl:0.765-0.908) |
| Accuracy | 0.749(95%Cl:0.747-0.751) |
| Positive Predictive Value | 0.830(95%Cl:0.756-0.904) |
| Negative Predictive Value | 0.685(95%Cl:0.604-0.766) |
| KAPPA | 0.503(95%Cl:0.393-0.612) |
| Youden’s Index | 0.512 |
| Hosmer-Lemeshow Test | χ²=11.031;p=0.200 |
| C-index (Bootstrap)​ | 0.813 (95% CI: 0.757–0.864) |

Notes: AUC: area under the curve; CI: confidence interval. The C-index was corrected via bootstrap resampling to account for overfitting.

**TableS5.** **Performance metrics of the nomogram with 10-fold cross-validation.**

| **Metric** | **Result** |
| --- | --- |
| Cutoff Value | 0.496 |
| AUC | 0.796(95% CI: 0.737-0.854) |
| P-value | 0.000 |
| Sensitivity | 0.756(95% CI: 0.680-0.832) |
| Specificity | 0.740(95% CI: 0.656-0.825) |
| Accuracy | 0.749(95% CI: 0.747-0.751) |
| Positive Predictive Value | 0.775(95% CI: 0.700-0.850) |
| Negative Predictive Value | 0.720(95% CI: 0.635-0.805) |
| KAPPA | 0.495(95% CI: 0.382-0.609) |
| Youden’s Index | 0.496 |

Notes: AUC: area under the curve; CI: confidence interval.

**TableS6.** **Performance metrics of the nomogram with bootstrap internal validation.**

| **Metric** | **Result** |
| --- | --- |
| Cutoff Value | 0.514 |
| AUC | 0.776(95% CI:0.773-0.779) |
| P-value | 0.000 |
| Sensitivity | 0.706(95% CI:0.702-0.710) |
| Specificity | 0.738(95% CI:0.734-0.743) |
| Accuracy | 0.721(95% CI:0.721-0.721) |
| Positive Predictive Value | 0.761(95% CI:0.757-0.765) |
| Negative Predictive Value | 0.680(95% CI:0.676-0.685) |
| KAPPA | 0.441(95% CI:0.435, 0.447) |
| Youden’s Index | 0.444 |

Notes: AUC: area under the curve; CI: confidence interval.
